# Supplementary material for: Intermittent Fasting Enhanced the Cognitive Function in Older Adults with Mild Cognitive Impairment by Inducing Biochemical and Metabolic changes: A 3-Year Progressive Study
Source: PubMed Central journal article supplement (PMC7551340; doi:10.3390/nu12092644), 2020-08-30
Supplement: nutrients-12-02644-s001.pdf [file nutrients-12-02644-s001.pdf]

a. Scatter plot PCA-X

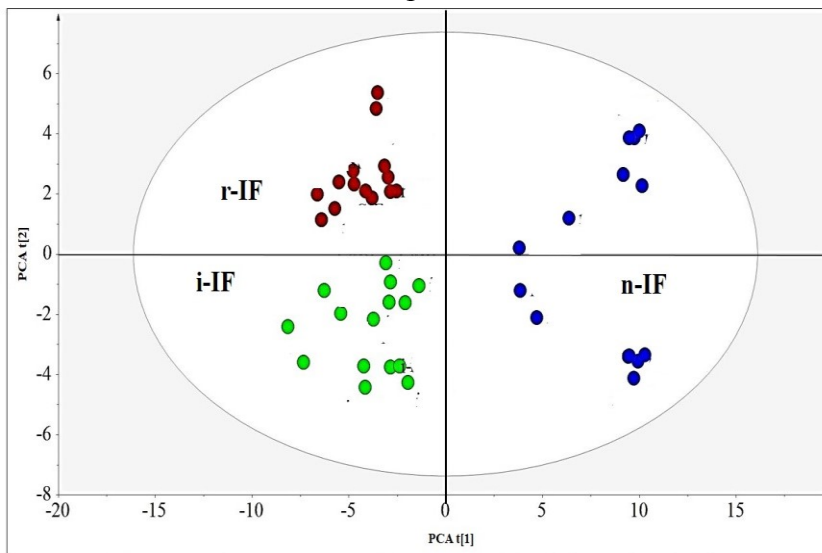

b. Scatter plot PLS-DA

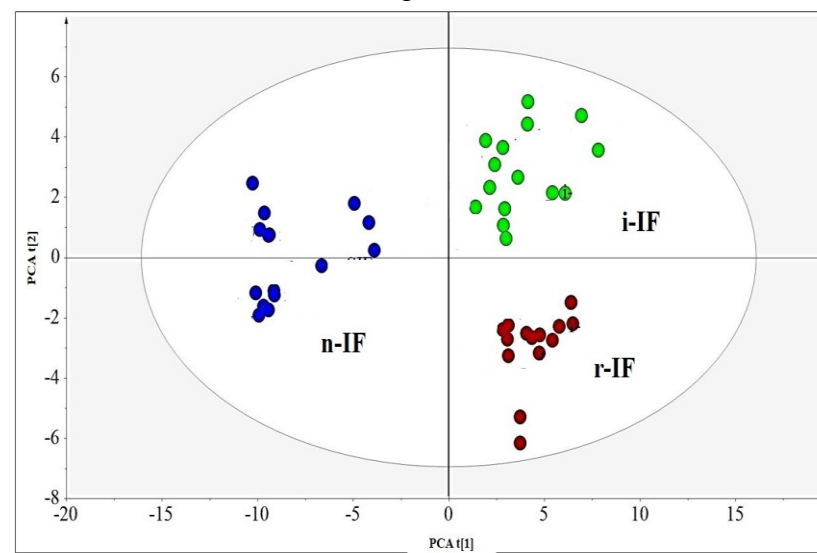

c. Permutation test (r-IF)

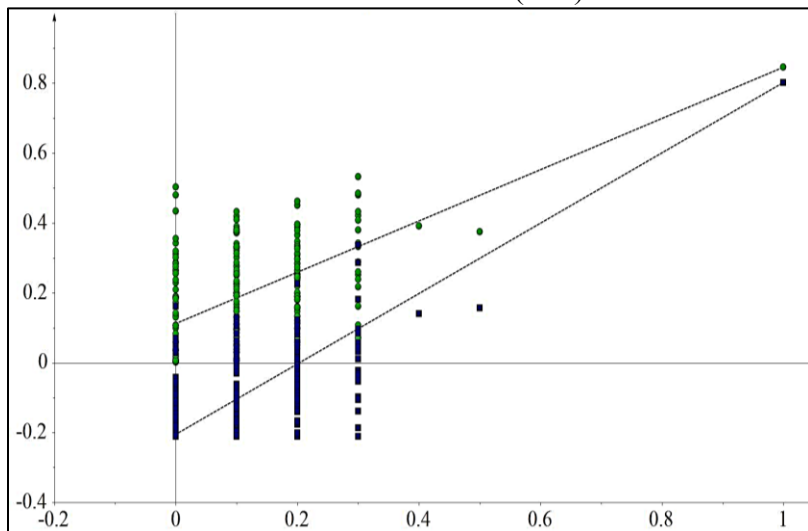

d. Permutation test (i-IF)

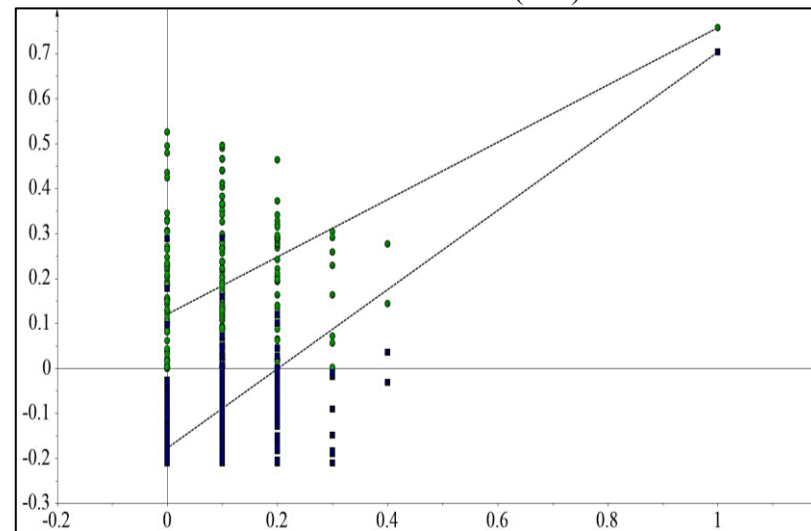

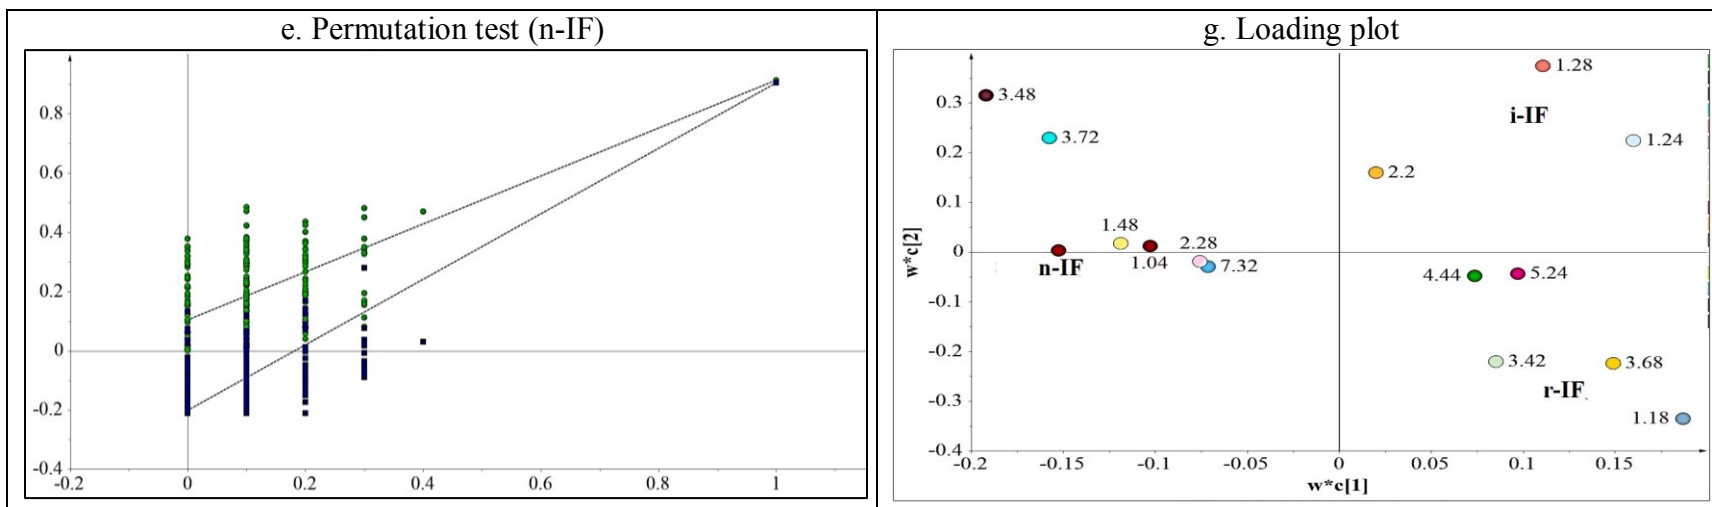

**Figure S1.** The PCA-X scatter plot, PLS-DA scatter plot, permutation test, and loading plot of the metabolomics analysis.

Valine

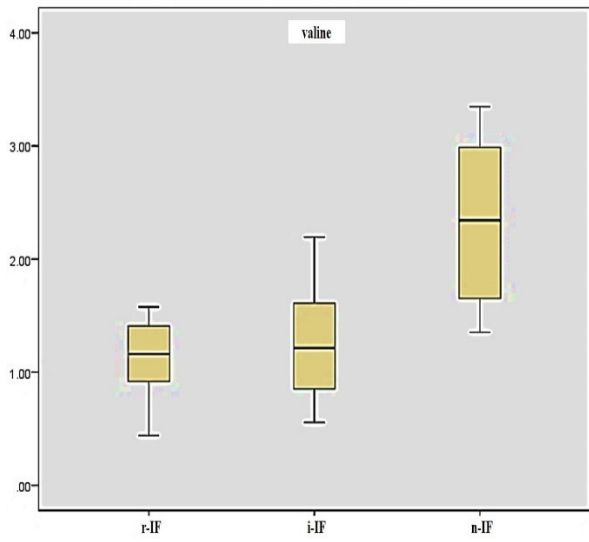

3-hydroxybutyrate

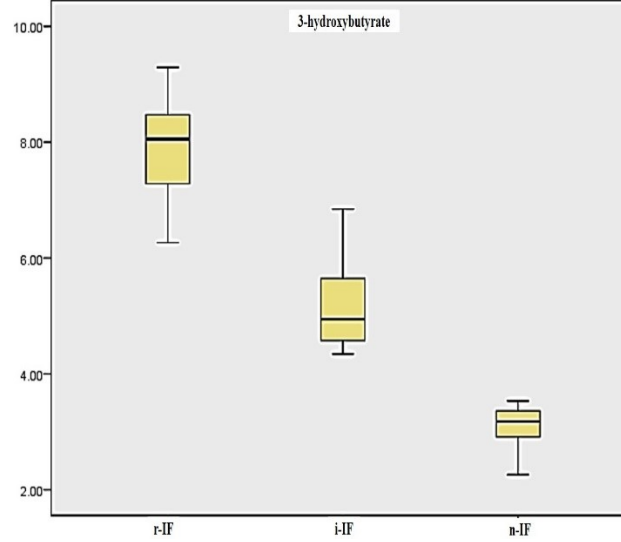

Isoleucine

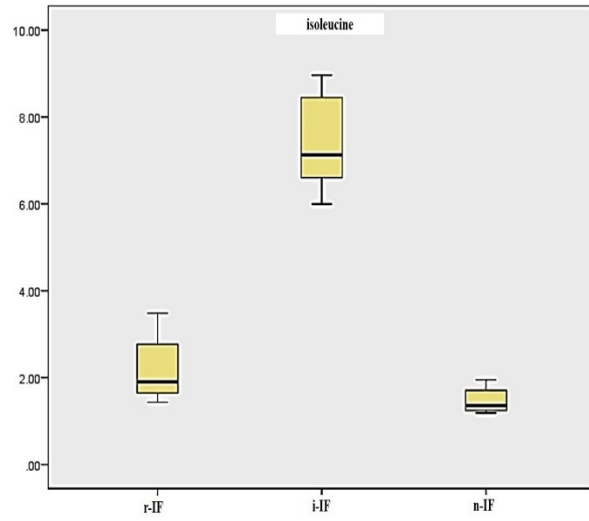

2,3-hydroxymethylglutaryl-CoA

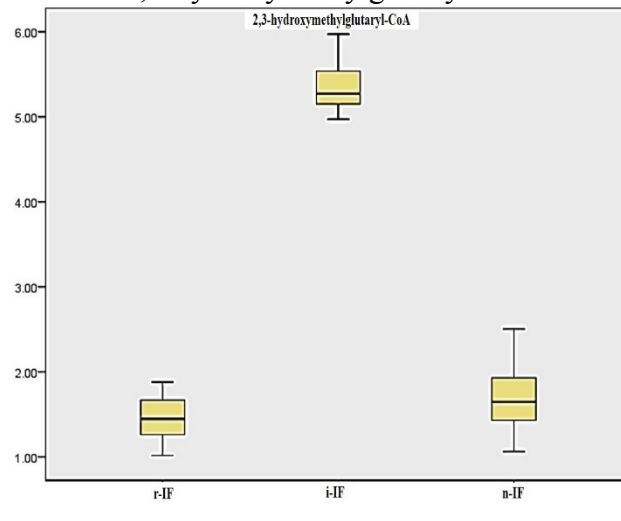

Alanine

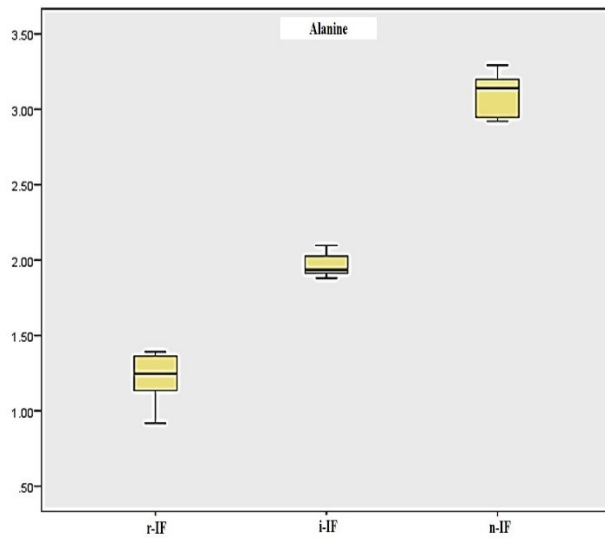

Acetate

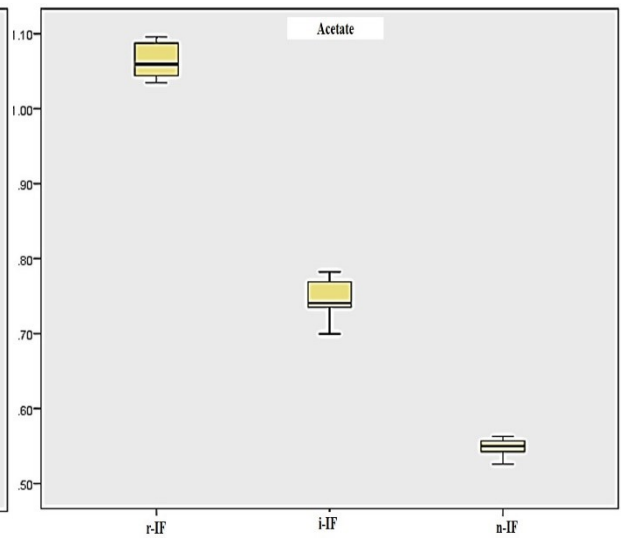

2-aminoadipate

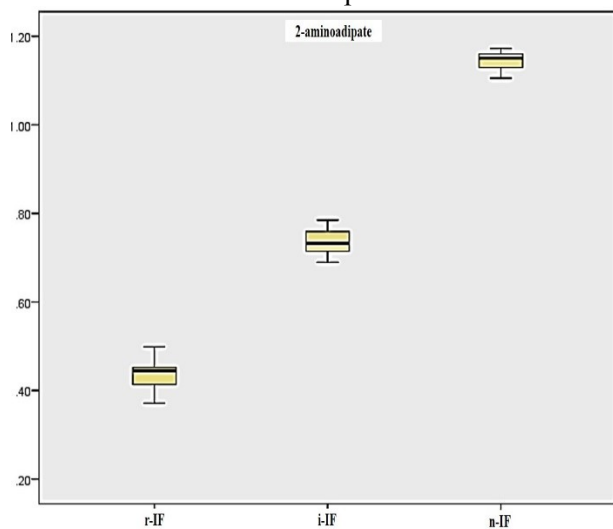

Glutamate

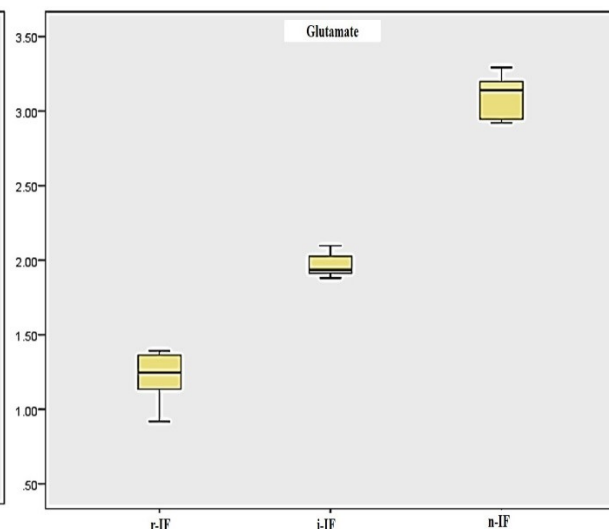

Glutathione

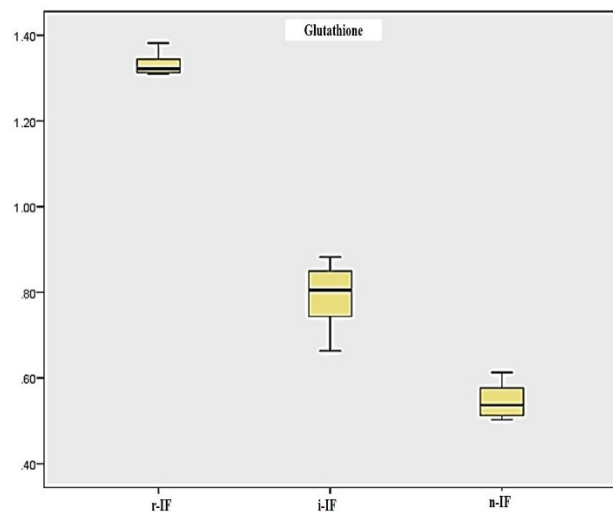

4-hydroxybutyrate

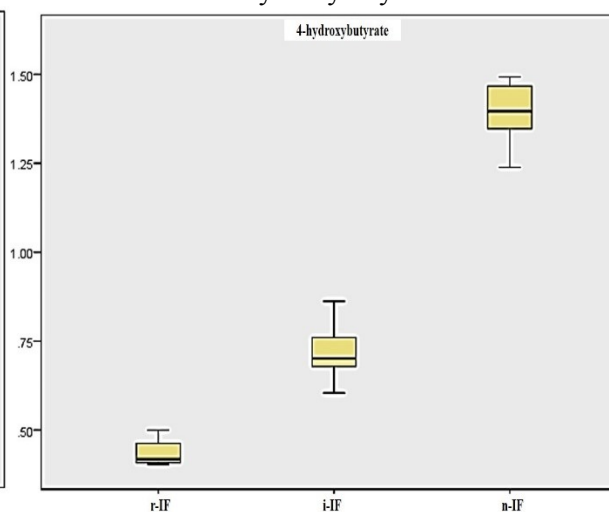

Acetoacetate

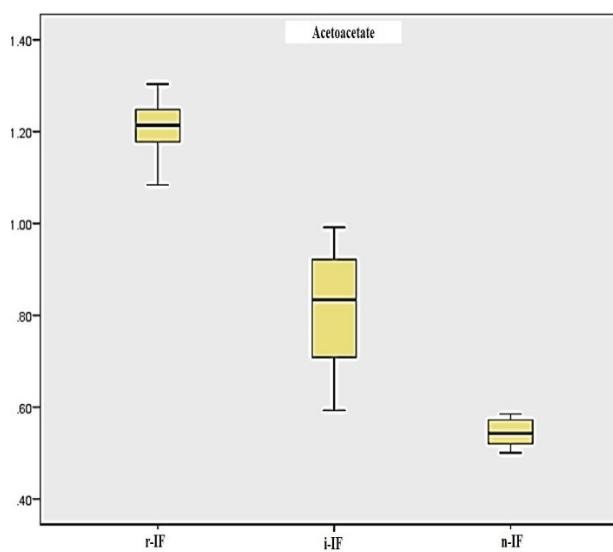

s-sulfocysteine

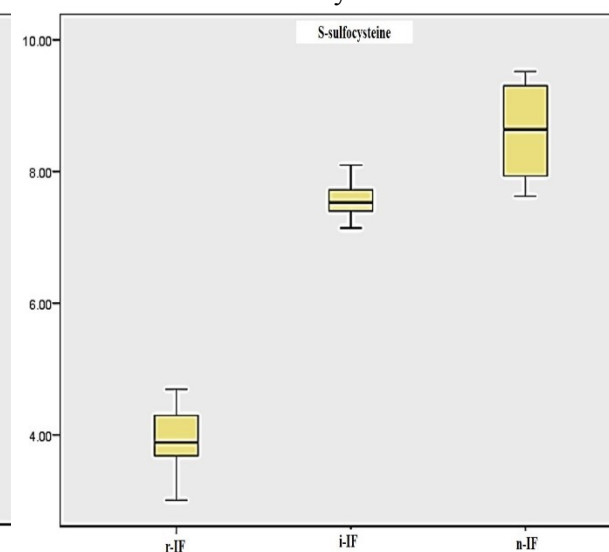

n-acetylglucosamine

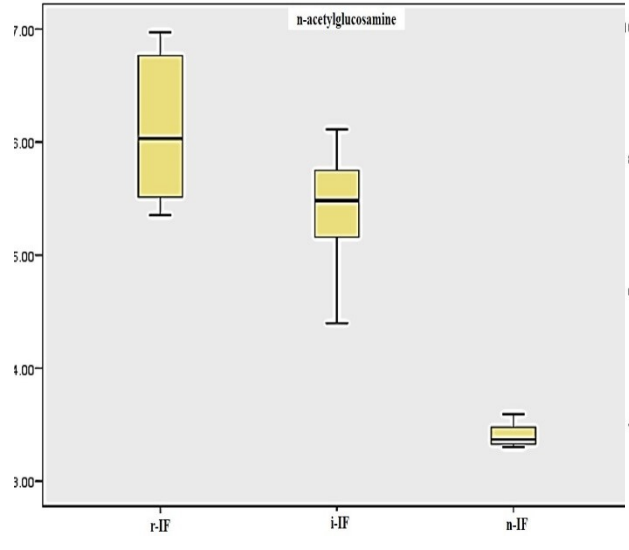

2'-deoxyguanosine

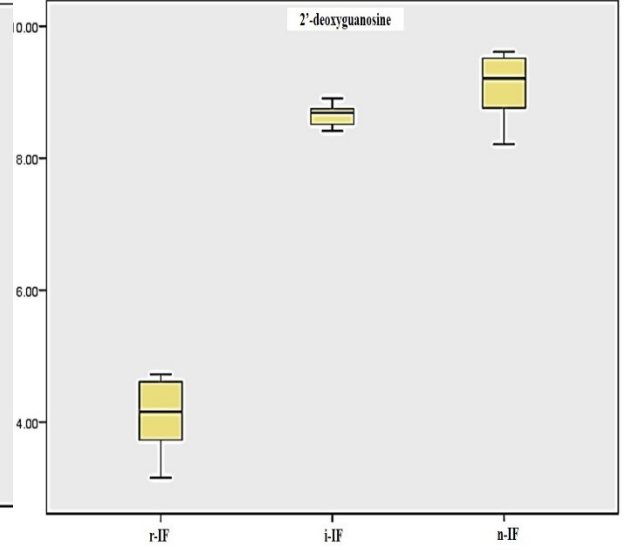

2-hydroxybutyrate

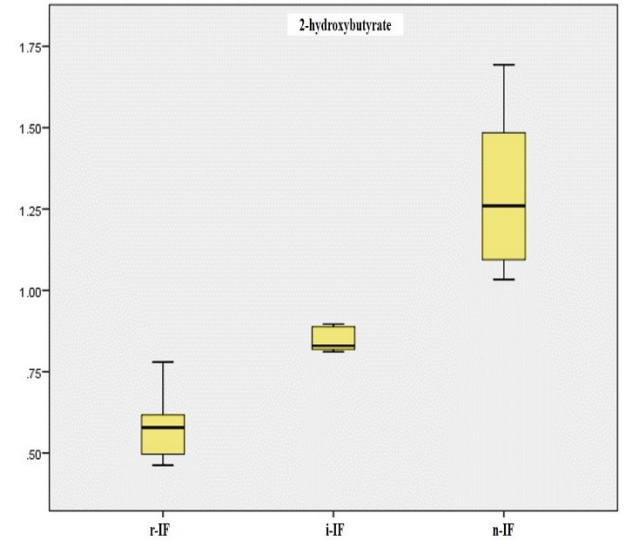

Hippurate

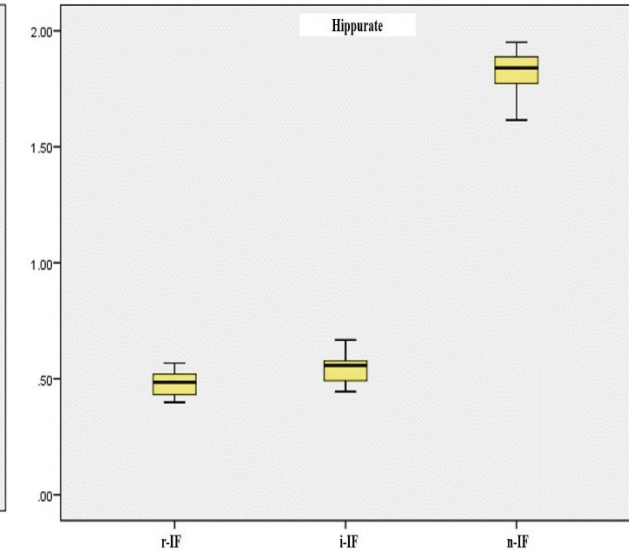

Proline

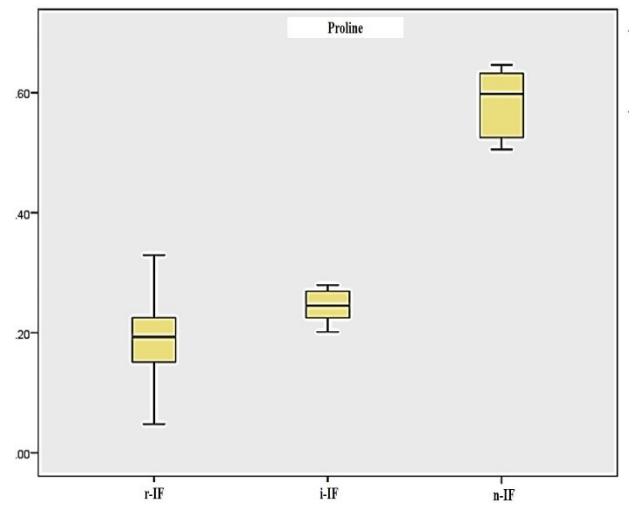

Guanosine

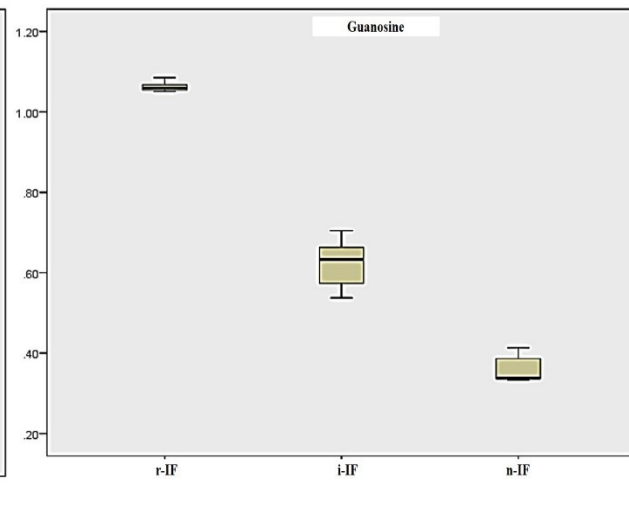

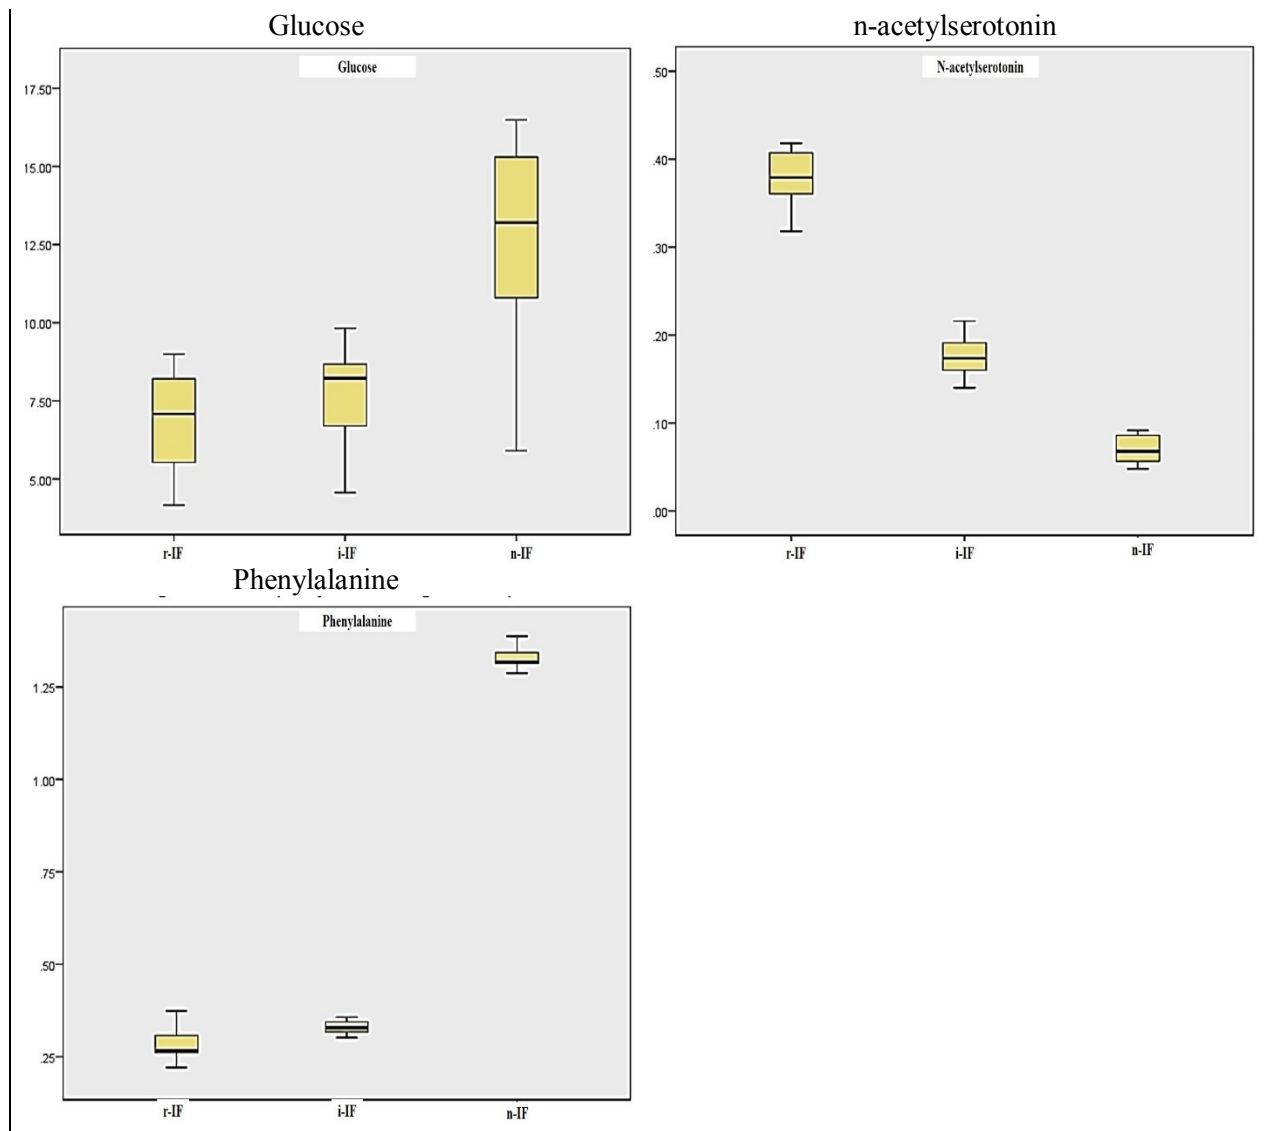

**Figure S2.** Box-and-whisker plots for each plasma metabolites concentration in relation with fasting status
